# Supplementary material for: Expanding horizons: new roles for non-canonical RNA-binding proteins in cancer
Source: PubMed Central journal article supplement (PMC5894799; doi:10.1016/j.gde.2017.11.006), 2018-02
Supplement: mmc1.pdf [file mmc1.pdf]

# Supplementary Figure 1

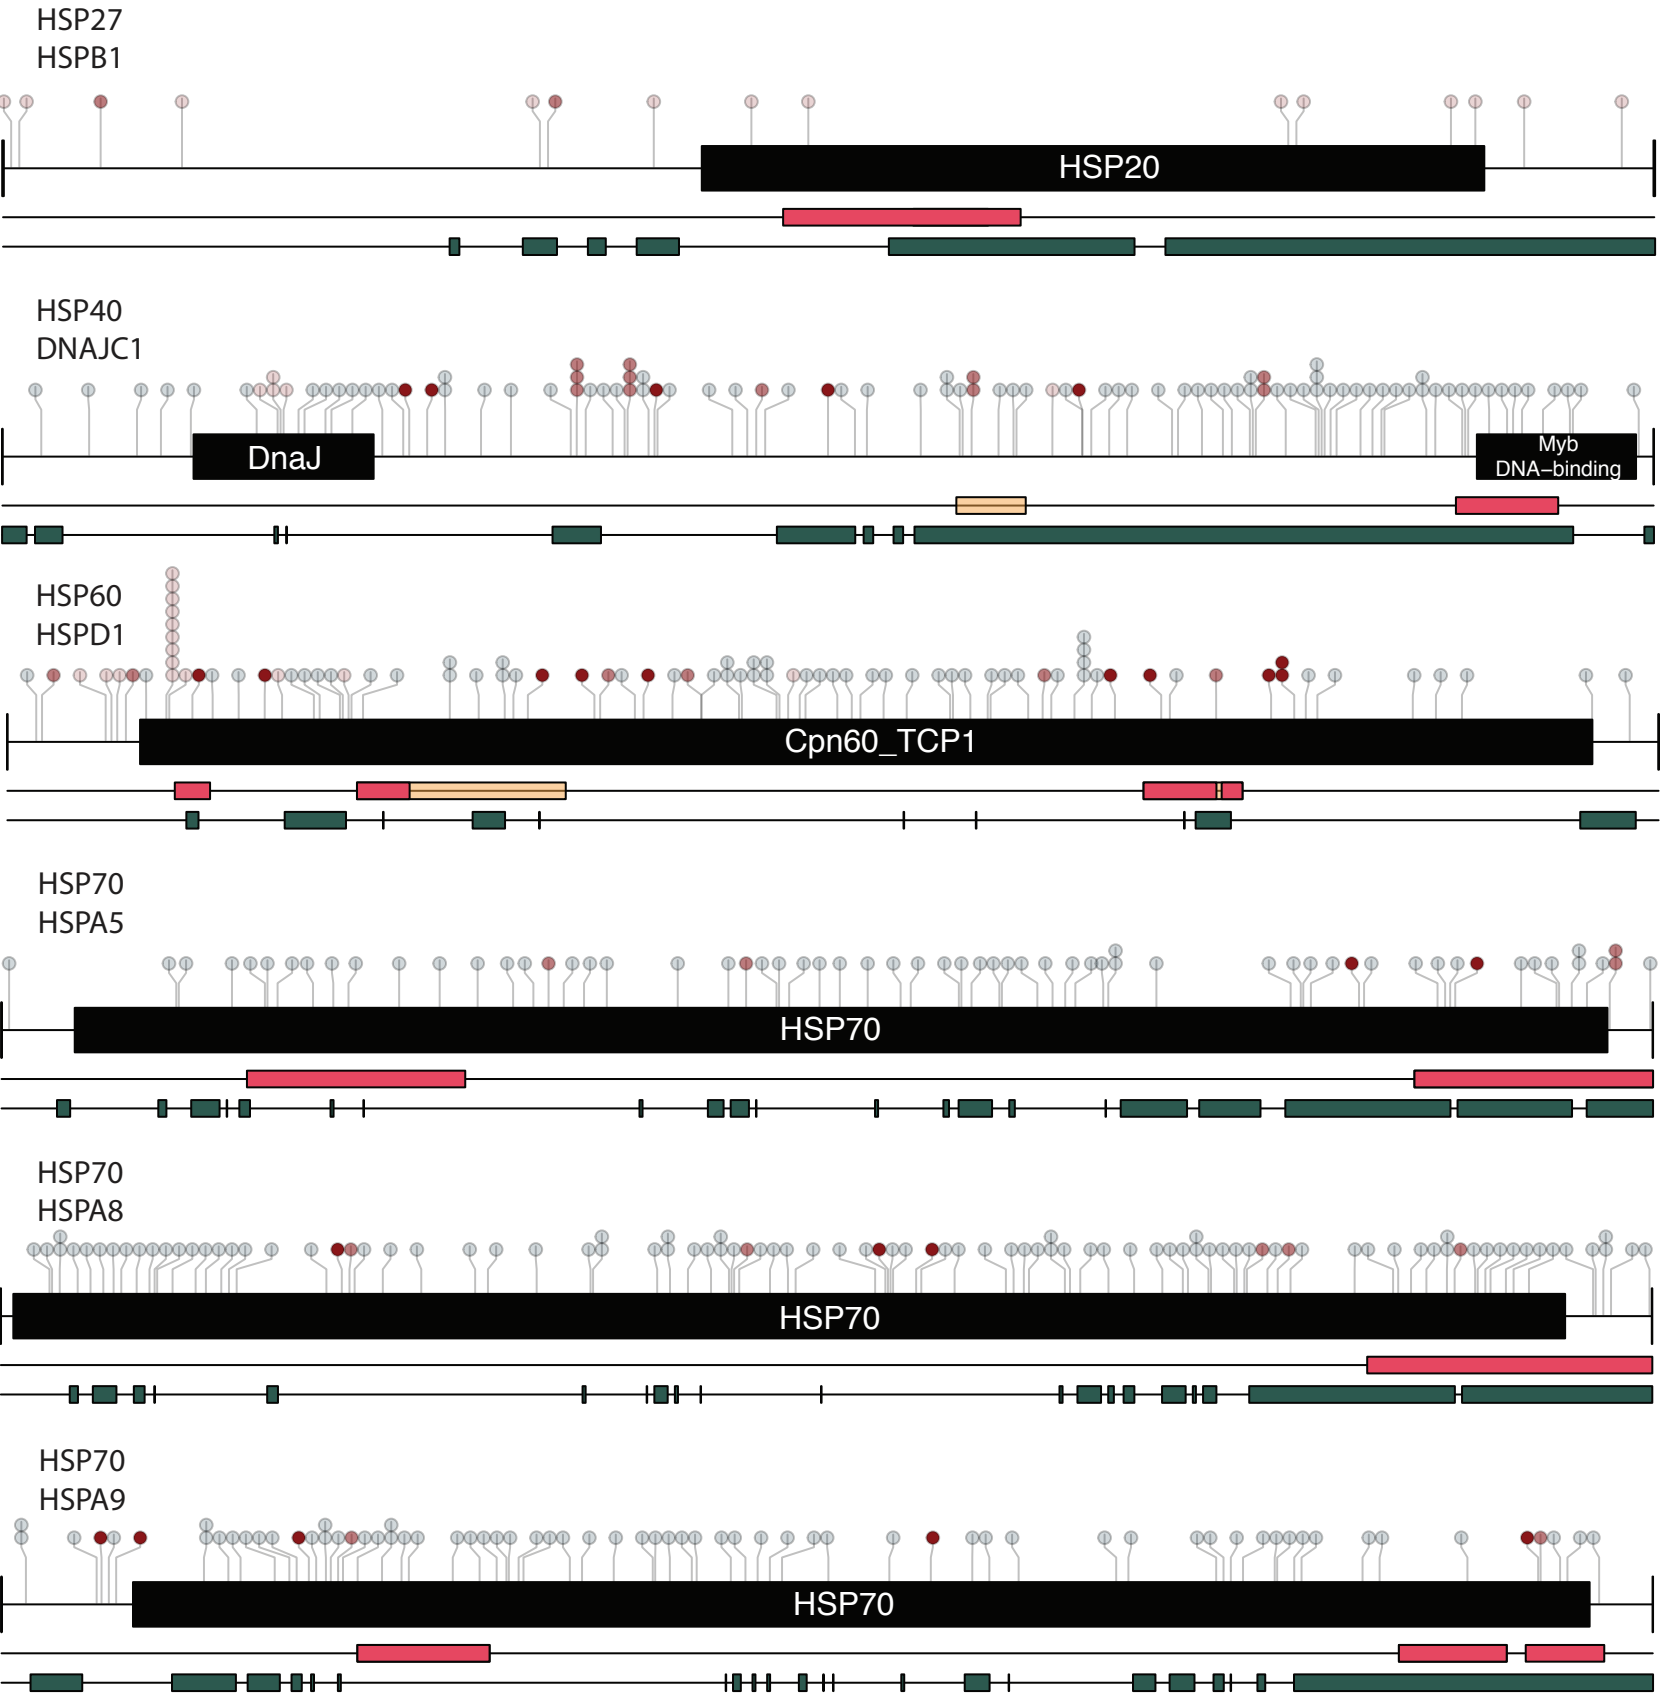

## Legend:

- ICGC mutations
- Stop (high)
  - Frameshift (high)
  - Missense (high)
  - Missense (low)
- Other features
- RNA-binding
  - Disorder
