# Supplementary material for: Expanding horizons: new roles for non-canonical RNA-binding proteins in cancer
Source: PubMed Central journal article supplement (PMC5894799; doi:10.1016/j.gde.2017.11.006), 2018-02
Supplement: mmc2.pdf [file mmc2.pdf]

# Supplementary Figure 2

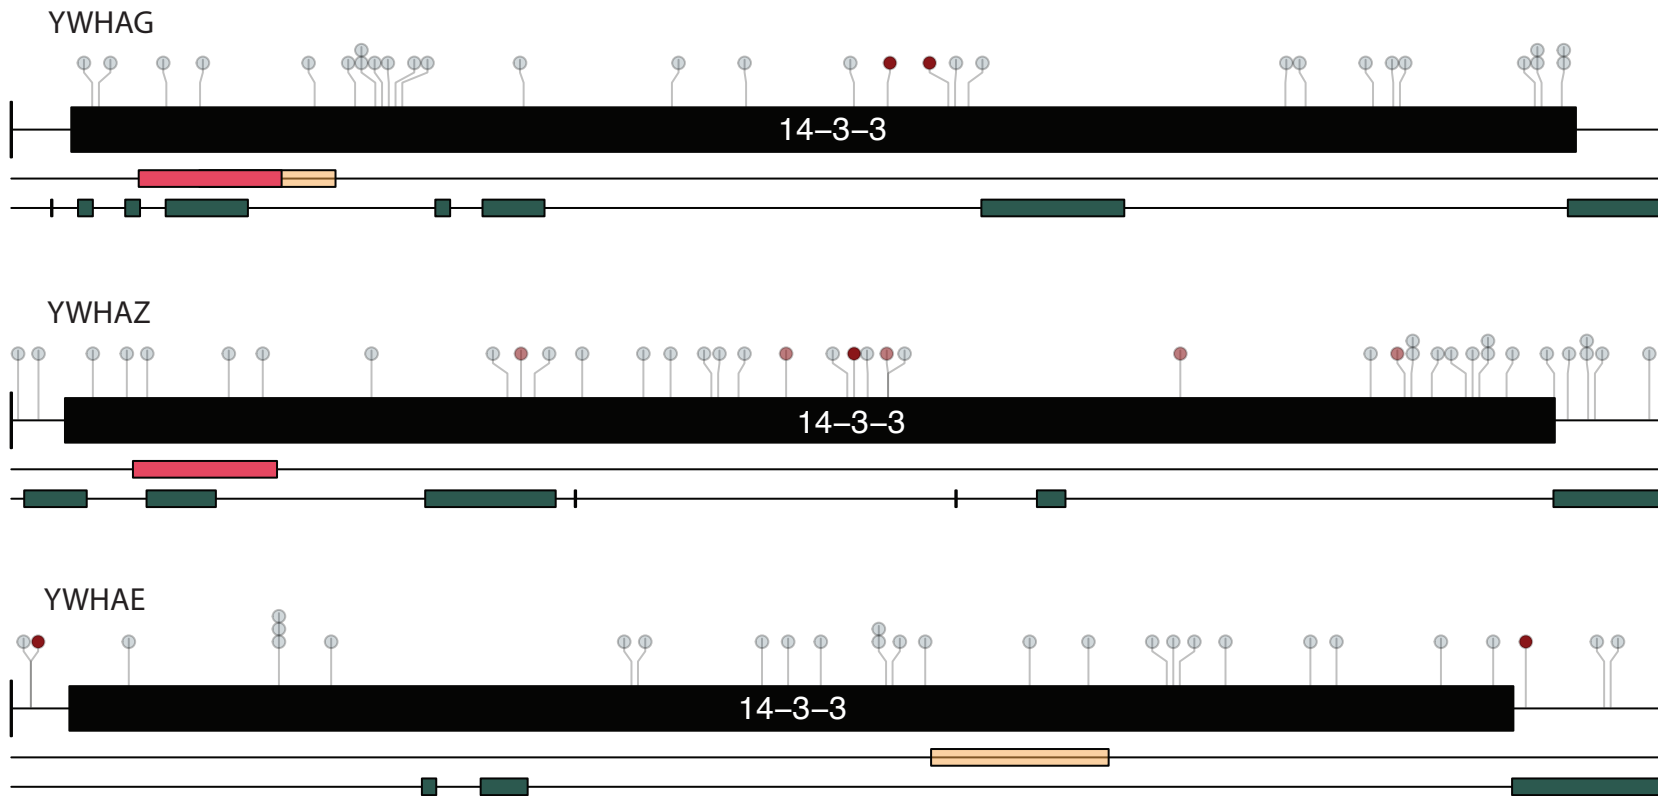

## Legend:

ICGC mutations

- Stop (high)
- Frameshift (high)
- Missense (high)
- Missense (low)

Other features

- RNA-binding
- Disorder
