# Supplementary material for: Expanding horizons: new roles for non-canonical RNA-binding proteins in cancer
Source: PubMed Central journal article supplement (PMC5894799; doi:10.1016/j.gde.2017.11.006), 2018-02
Supplement: mmc3.pdf [file mmc3.pdf]

# Supplementary Figure 3

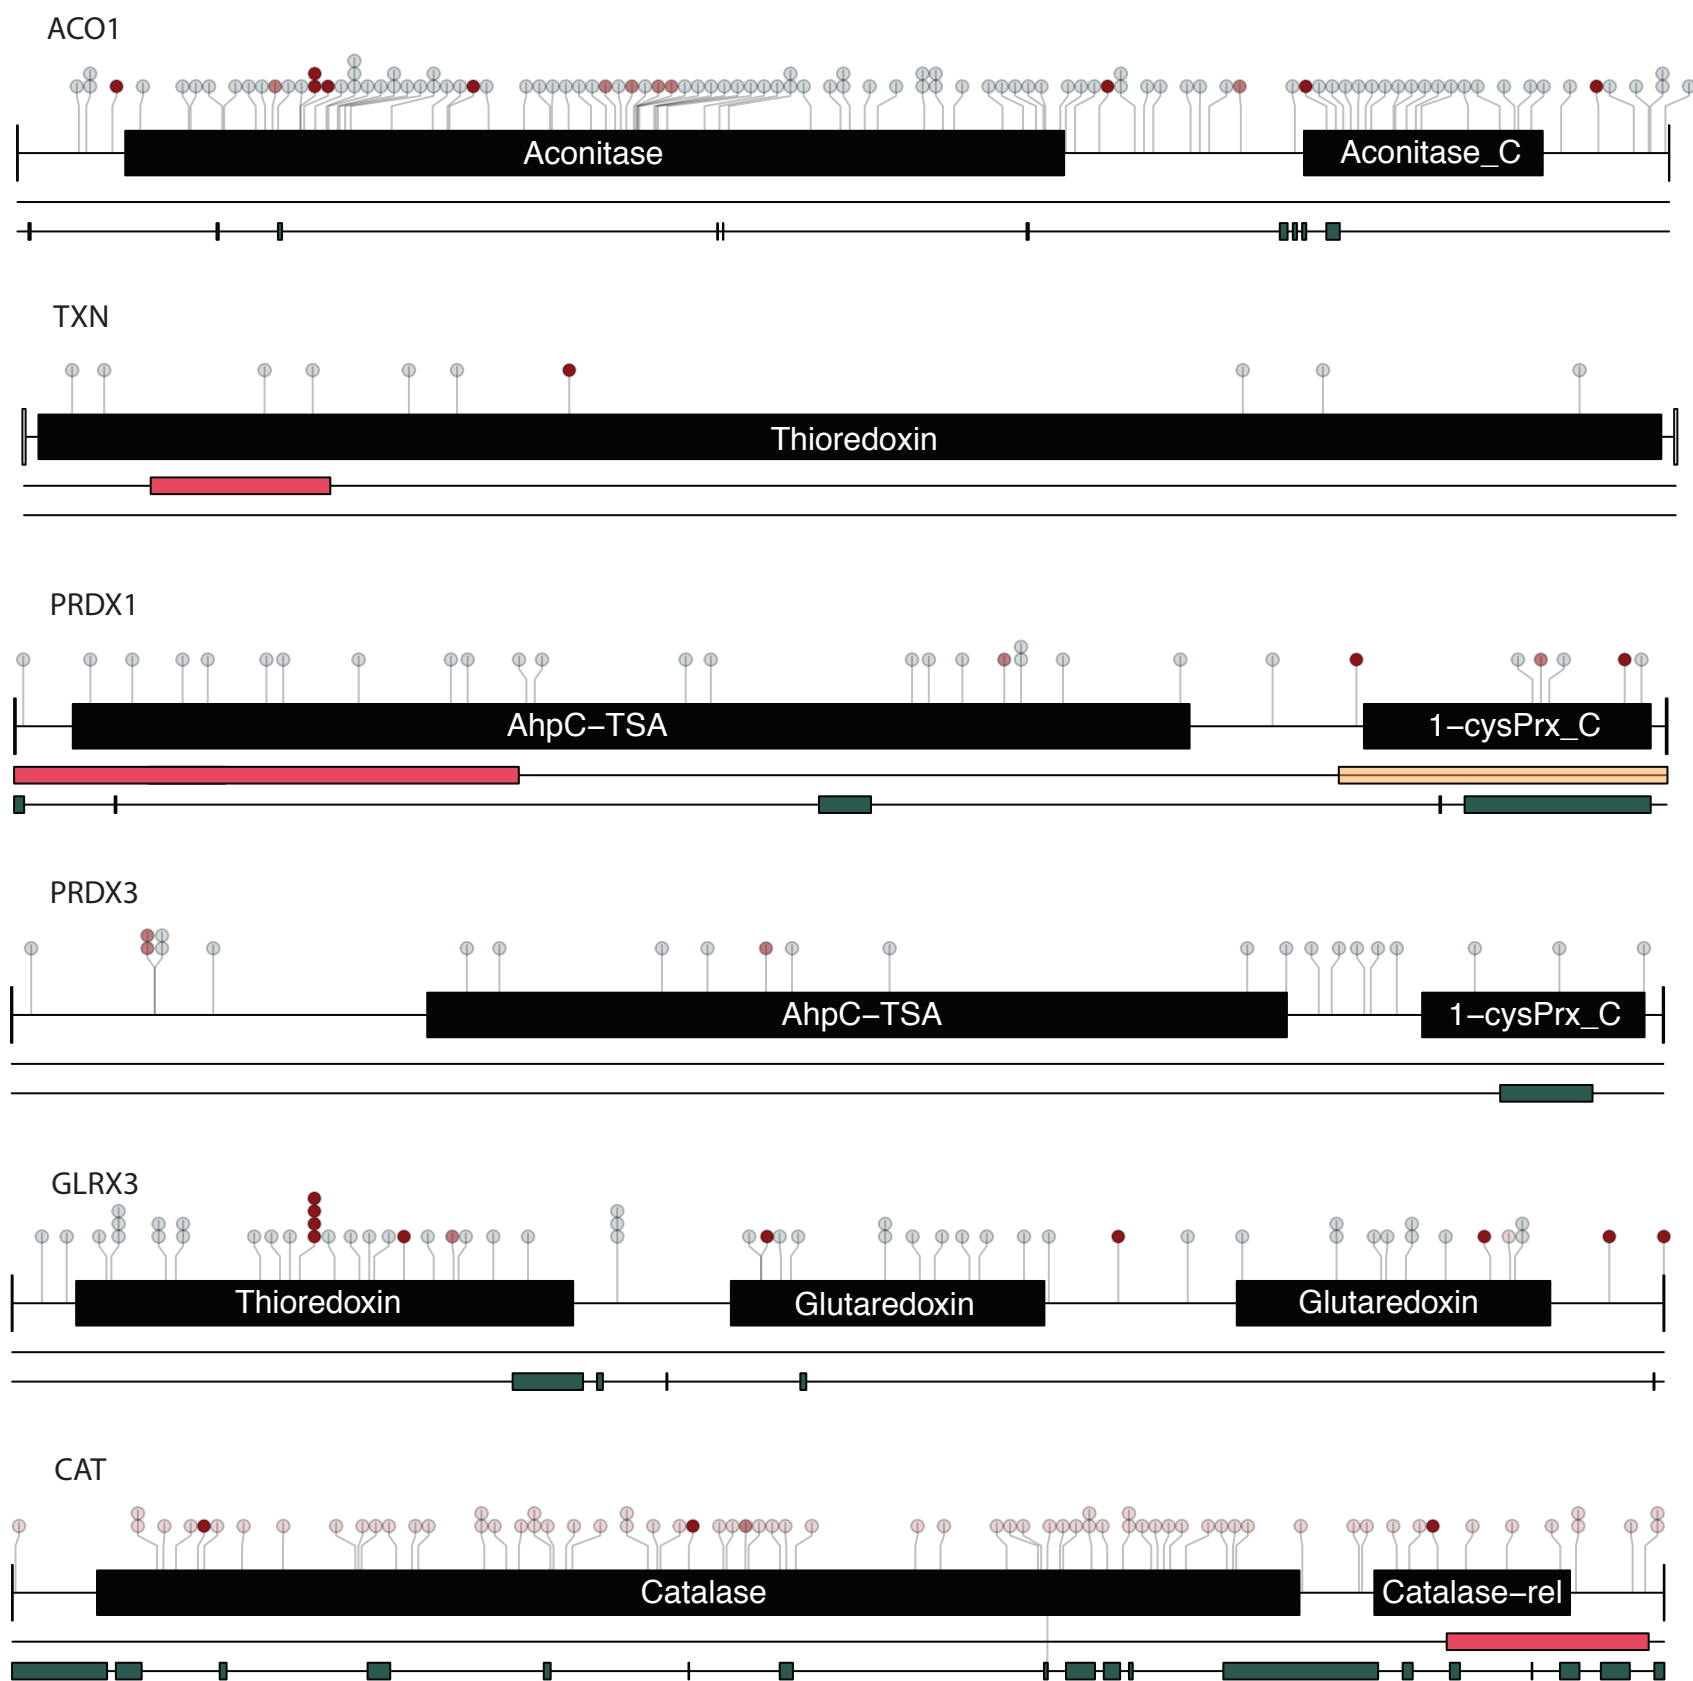

## Legend:

### ICGC mutations

● Stop (high) ● Frameshift (high) ● Missense (high) ● Missense (low)

### Other features

■ RNA-binding ■ Disorder
